# Supplementary material for: Building a learnable universal coordinate system for single-cell atlas with a joint-VAE model
Source: PubMed Central journal article supplement — Commun Biol. 2024 Aug 12;7:977. doi: 10.1038/s42003-024-06564-0 (PMC11319358; doi:10.1038/s42003-024-06564-0), 2024-08-12
Supplement: 42003_2024_6564_MOESM1_ESM.pdf [file 42003_2024_6564_MOESM1_ESM.pdf]

## Supplemental Materials

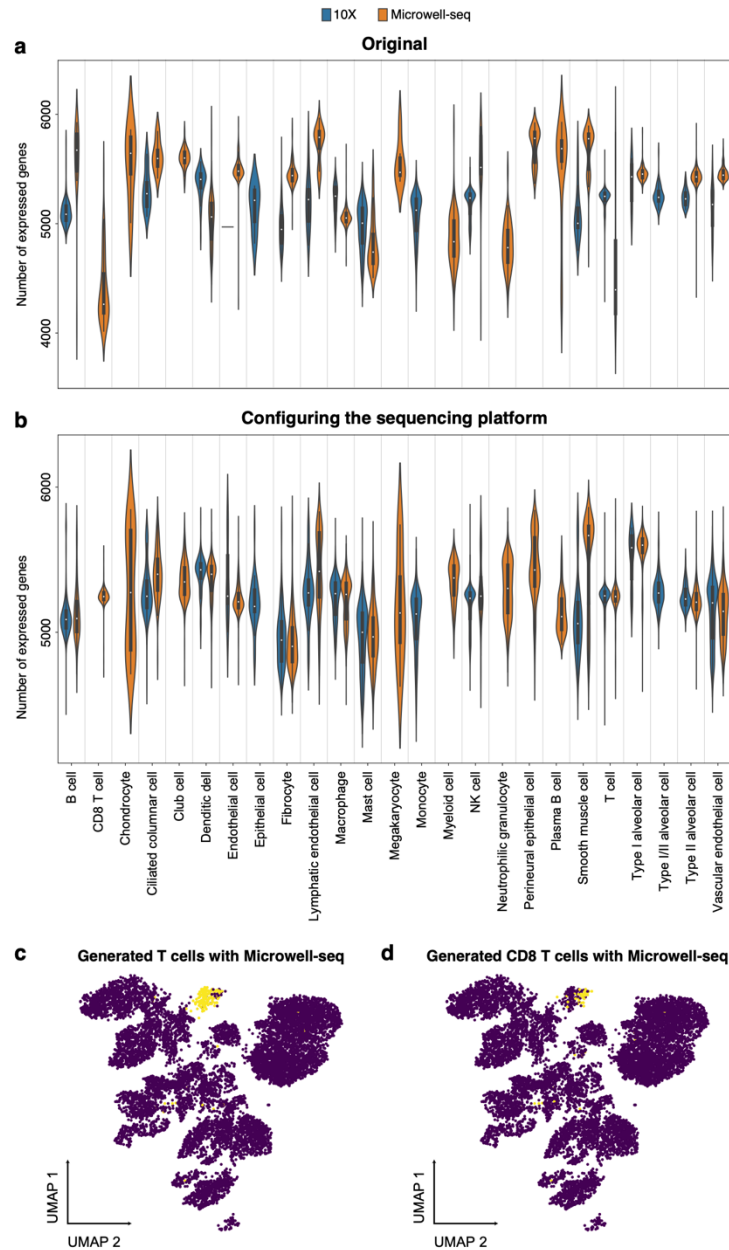

**Supplemental Figure 1.** Distribution of the number of expressed genes with different sequencing platforms in the original cells (a) and cells with sequencing platformed reconfigured into 10X (b). (c) The UMAP plot of original cells (blue) and cells with the cell type reconfigured into T cells with Microwell-seq (yellow). (d) The UMAP plot of original cells (blue) and cells with the cell type reconfigured into CD8 T cells by Microwell-seq (yellow). For (c) and (d), for each generated cell, we calculated its nearest neighbor in the original dataset for visualization.

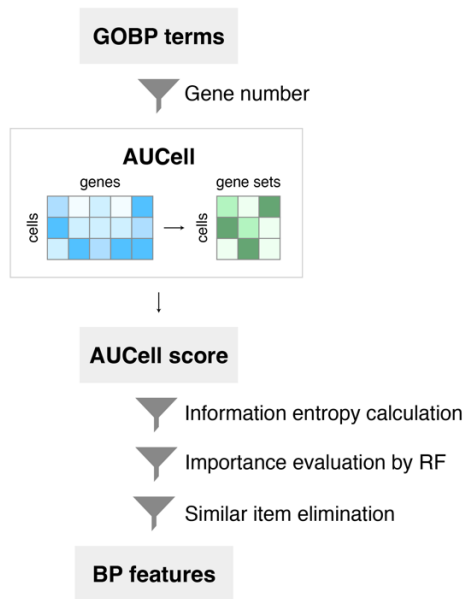

**Supplemental Figure 2.** The generation of BP features.

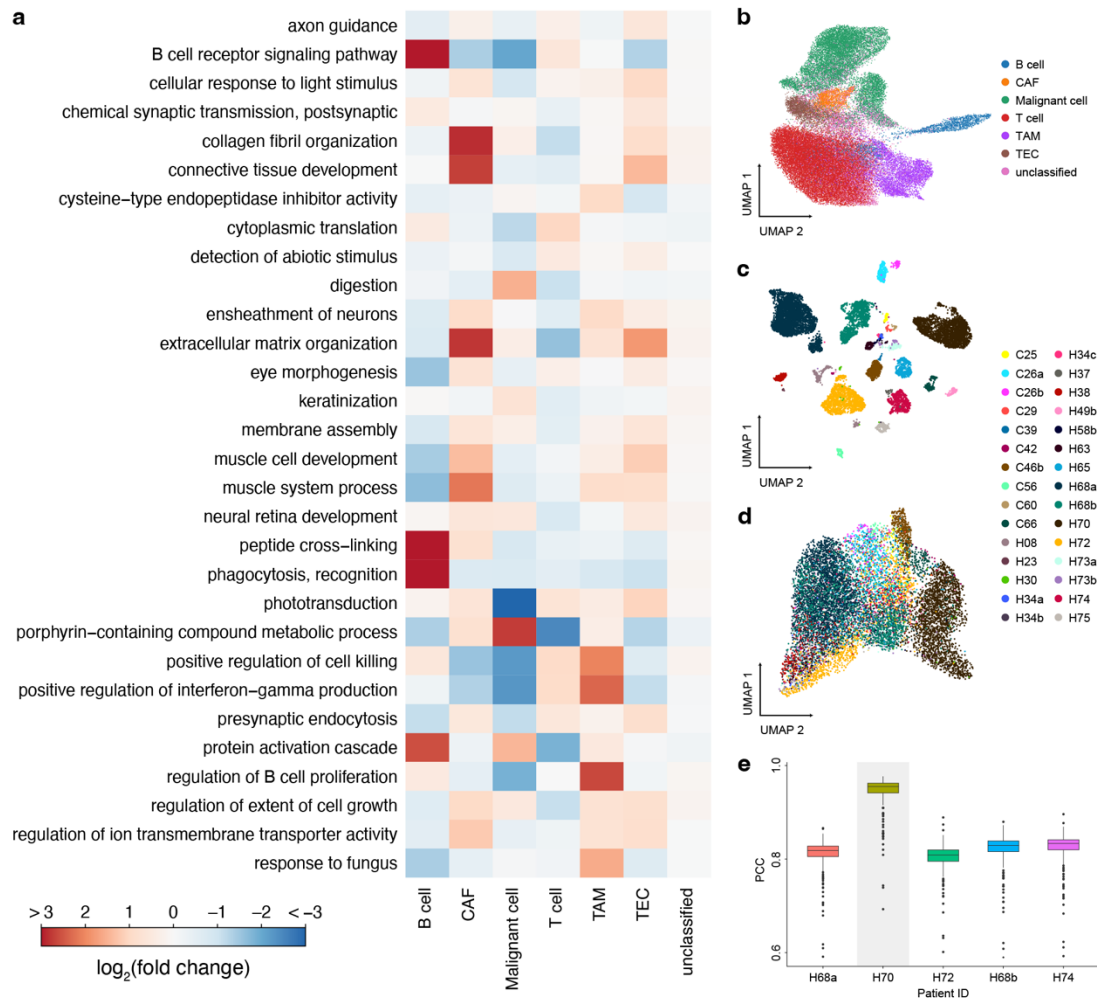

**Supplemental Figure 3.** (a) Fold changes of BP features of each cell type in the HCC dataset. (b) UMAP visualizations of the GOBP latent dimensions of the HCC dataset. Cells are colored by cell types. (c-d) The UMAP plot showing the landscape of the malignant cells in the HCC dataset, represented by PCA (c) and the pre-trained UniCoord model (d). Cells are colored by sample IDs. (e) PCCs between generated cells and the mean gene expression of malignant cells in each patient. The cells are generated by reconfiguring the patient ID of malignant cells from patient H72 as H70. The reconfigured target sample ID is shaded in grey.

**Supplemental Table 1.** The list of BP features.

| <b>BP features</b>                                   | <b>number of genes</b> |
|------------------------------------------------------|------------------------|
| axon guidance                                        | 280                    |
| B cell receptor signaling pathway                    | 153                    |
| cellular response to light stimulus                  | 136                    |
| chemical synaptic transmission, postsynaptic         | 176                    |
| collagen fibril organization                         | 106                    |
| connective tissue development                        | 251                    |
| cysteine-type endopeptidase inhibitor activity       | 56                     |
| cytoplasmic translation                              | 151                    |
| detection of abiotic stimulus                        | 147                    |
| digestion                                            | 144                    |
| ensheathment of neurons                              | 135                    |
| extracellular matrix organization                    | 418                    |
| eye morphogenesis                                    | 150                    |
| keratinization                                       | 227                    |
| membrane assembly                                    | 202                    |
| muscle cell development                              | 171                    |
| muscle system process                                | 437                    |
| neural retina development                            | 70                     |
| peptide cross-linking                                | 102                    |
| phagocytosis, recognition                            | 154                    |
| phototransduction                                    | 58                     |
| porphyrin-containing compound metabolic process      | 53                     |
| positive regulation of cell killing                  | 72                     |
| positive regulation of interferon-gamma production   | 72                     |
| presynaptic endocytosis                              | 64                     |
| protein activation cascade                           | 229                    |
| regulation of B cell proliferation                   | 63                     |
| regulation of extent of cell growth                  | 110                    |
| regulation of ion transmembrane transporter activity | 265                    |
| response to fungus                                   | 58                     |
