# Supplementary material for: Building a learnable universal coordinate system for single-cell atlas with a joint-VAE model
Source: PubMed Central journal article supplement — Commun Biol. 2024 Aug 12;7:977. doi: 10.1038/s42003-024-06564-0 (PMC11319358; doi:10.1038/s42003-024-06564-0), 2024-08-12
Supplement: 42003_2024_6564_MOESM2_ESM.pdf [file 42003_2024_6564_MOESM2_ESM.pdf]

## Description of Additional Supplementary Files

**File name:** Supplementary Movie 1

**Description:** Illustrates the generated cells as the latent score changes.
