# Supplementary material for: Building a learnable universal coordinate system for single-cell atlas with a joint-VAE model
Source: PubMed Central journal article supplement — Commun Biol. 2024 Aug 12;7:977. doi: 10.1038/s42003-024-06564-0 (PMC11319358; doi:10.1038/s42003-024-06564-0), 2024-08-12
Supplement: 42003_2024_6564_MOESM4_ESM.pdf [file 42003_2024_6564_MOESM4_ESM.pdf]

## Reporting Summary

Nature Portfolio wishes to improve the reproducibility of the work that we publish. This form provides structure for consistency and transparency in reporting. For further information on Nature Portfolio policies, see our [Editorial Policies](#) and the [Editorial Policy Checklist](#).

### Statistics

For all statistical analyses, confirm that the following items are present in the figure legend, table legend, main text, or Methods section.

n/a Confirmed

- The exact sample size ( $n$ ) for each experimental group/condition, given as a discrete number and unit of measurement
- A statement on whether measurements were taken from distinct samples or whether the same sample was measured repeatedly
- The statistical test(s) used AND whether they are one- or two-sided  
*Only common tests should be described solely by name; describe more complex techniques in the Methods section.*
- A description of all covariates tested
- A description of any assumptions or corrections, such as tests of normality and adjustment for multiple comparisons
- A full description of the statistical parameters including central tendency (e.g. means) or other basic estimates (e.g. regression coefficient) AND variation (e.g. standard deviation) or associated estimates of uncertainty (e.g. confidence intervals)
- For null hypothesis testing, the test statistic (e.g.  $F$ ,  $t$ ,  $r$ ) with confidence intervals, effect sizes, degrees of freedom and  $P$  value noted  
*Give  $P$  values as exact values whenever suitable.*
- For Bayesian analysis, information on the choice of priors and Markov chain Monte Carlo settings
- For hierarchical and complex designs, identification of the appropriate level for tests and full reporting of outcomes
- Estimates of effect sizes (e.g. Cohen's  $d$ , Pearson's  $r$ ), indicating how they were calculated

*Our web collection on [statistics for biologists](#) contains articles on many of the points above.*

### Software and code

Policy information about [availability of computer code](#)

Data collection

Data analysis

For manuscripts utilizing custom algorithms or software that are central to the research but not yet described in published literature, software must be made available to editors and reviewers. We strongly encourage code deposition in a community repository (e.g. GitHub). See the Nature Portfolio [guidelines for submitting code & software](#) for further information.

### Data

Policy information about [availability of data](#)

All manuscripts must include a [data availability statement](#). This statement should provide the following information, where applicable:

- Accession codes, unique identifiers, or web links for publicly available datasets
- A description of any restrictions on data availability
- For clinical datasets or third party data, please ensure that the statement adheres to our [policy](#)

We only used public datasets in this study. The hECA data can be downloaded through the Python package ECAUGT. The mouse endothelial atlas dataset is available on the ArrayExpress database, with the Entrez accession number E-MTAB-8077. The mouse embryo trajectory data is available on the Gene Expression Omnibus

(GEO) database with the accession number GSE122662. The human heart cell atlas data can be downloaded from its interactive website (<http://xglab.tech/hahca>). The HCC dataset is available on the GEO database with the accession number GSE151530.

## Human research participants

Policy information about [studies involving human research participants and Sex and Gender in Research](#).

|                             |                                 |
|-----------------------------|---------------------------------|
| Reporting on sex and gender | <input type="text" value="NA"/> |
| Population characteristics  | <input type="text" value="NA"/> |
| Recruitment                 | <input type="text" value="NA"/> |
| Ethics oversight            | <input type="text" value="NA"/> |

Note that full information on the approval of the study protocol must also be provided in the manuscript.

## Field-specific reporting

Please select the one below that is the best fit for your research. If you are not sure, read the appropriate sections before making your selection.

Life sciences       Behavioural & social sciences       Ecological, evolutionary & environmental sciences

For a reference copy of the document with all sections, see [nature.com/documents/nr-reporting-summary-flat.pdf](https://www.nature.com/documents/nr-reporting-summary-flat.pdf)

## Life sciences study design

All studies must disclose on these points even when the disclosure is negative.

|                 |                                                                                                                                                                                                                                                                                                                                                             |
|-----------------|-------------------------------------------------------------------------------------------------------------------------------------------------------------------------------------------------------------------------------------------------------------------------------------------------------------------------------------------------------------|
| Sample size     | In this study, we applied UniCoord on different datasets to evaluate its performance. For the model pre-trained by hECA data, We randomly sampled 50,000 cells from the dataset and used these cells to train a UniCoord model. For other models, all cells in the dataset that conform to the description in each experiment were used for model training. |
| Data exclusions | No data were excluded.                                                                                                                                                                                                                                                                                                                                      |
| Replication     | For cell generation experiments, we sampled the latent distribution for plenty of times to evaluate the consistency in cell generation.                                                                                                                                                                                                                     |
| Randomization   | We randomly sampled variables according to the distribution described in the manuscript as the features to generate cells.                                                                                                                                                                                                                                  |
| Blinding        | Blinding is not necessary in this study as it is based on generative machine learning models and without any performance evaluation on a test set.                                                                                                                                                                                                          |

## Reporting for specific materials, systems and methods

We require information from authors about some types of materials, experimental systems and methods used in many studies. Here, indicate whether each material, system or method listed is relevant to your study. If you are not sure if a list item applies to your research, read the appropriate section before selecting a response.

### Materials & experimental systems

| n/a                                 | Involvement                                            |
|-------------------------------------|--------------------------------------------------------|
| <input checked="" type="checkbox"/> | <input type="checkbox"/> Antibodies                    |
| <input checked="" type="checkbox"/> | <input type="checkbox"/> Eukaryotic cell lines         |
| <input checked="" type="checkbox"/> | <input type="checkbox"/> Palaeontology and archaeology |
| <input checked="" type="checkbox"/> | <input type="checkbox"/> Animals and other organisms   |
| <input checked="" type="checkbox"/> | <input type="checkbox"/> Clinical data                 |
| <input checked="" type="checkbox"/> | <input type="checkbox"/> Dual use research of concern  |

### Methods

| n/a                                 | Involvement                                     |
|-------------------------------------|-------------------------------------------------|
| <input checked="" type="checkbox"/> | <input type="checkbox"/> ChIP-seq               |
| <input checked="" type="checkbox"/> | <input type="checkbox"/> Flow cytometry         |
| <input checked="" type="checkbox"/> | <input type="checkbox"/> MRI-based neuroimaging |
